# Supplementary material for: On-chip refractive index cytometry for whole-cell deformability discrimination
Source: Royal Society of Chemistry journal article supplement (doi:10.1039/c8lc00938d), 2018-12-14
Supplement: c8lc00938d1.pdf [file c8lc00938d1.pdf]

Electronic supplementary information

**On-Chip Refractive Index Cytometry for Whole-Cell  
Deformability Discrimination**

Antoine Leblanc-Hotte,<sup>\*a</sup> Nadine Sen Nkwe,<sup>b</sup> Geneviève Chabot-Roy,<sup>c</sup> El Bachir Affar,<sup>b</sup> Sylvie Lesage,<sup>cd</sup>  
Jean-Sébastien Delisle,<sup>efg</sup> and Yves-Alain Peter<sup>a</sup>

<sup>a</sup> Department of Engineering Physics, Polytechnique Montreal, Montreal, QC H3T 1J4, Canada.  
E-mail: antoine.leblanc-hotte@polymtl.ca

<sup>b</sup> Maisonneuve-Rosemont Hospital Research Center, Department of Medicine, University of Montreal, Montreal, QC H1T 2M4, Canada

<sup>c</sup> Cellular Immunogenetics Laboratory, Maisonneuve-Rosemont Hospital Research Center, Montreal, QC H1T 2M4, Canada

<sup>d</sup> Département de microbiologie, infectiologie et immunologie, University of Montreal, Montreal, QC H3C 3J7, Canada

<sup>e</sup> Cancer and Transplantation Immunology Laboratory, Maisonneuve-Rosemont Hospital Research Center, Montreal, QC H1T 2M4, Canada

<sup>f</sup> Department of Medicine, University of Montreal, Montreal, QC H3C 3J7, Canada

<sup>g</sup> Hemato-oncology service, Maisonneuve-Rosemont Hospital, Montreal, QC H1T 2M4, Canada

## Examples of numerical simulation curve

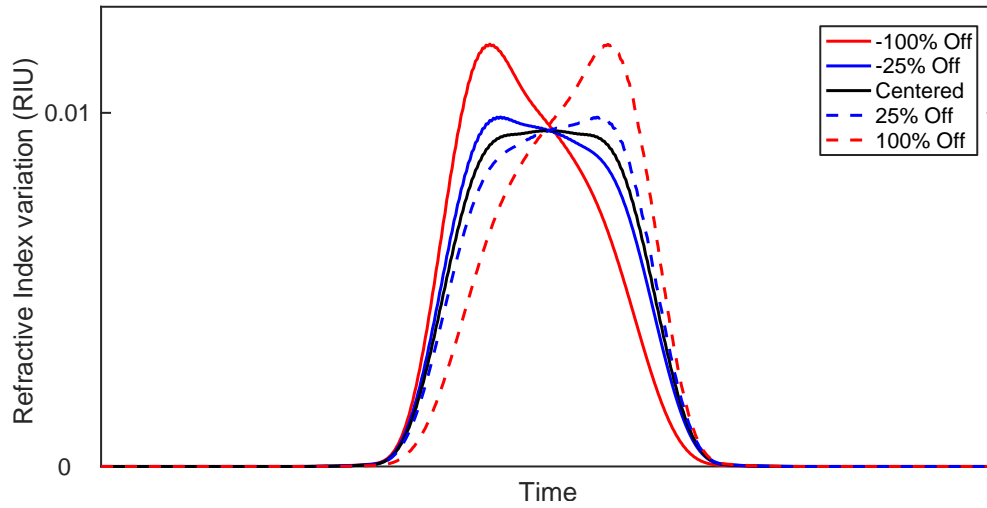

**Fig. S1** Examples of numerically simulated RI variation curve for different relative positions of the nucleus.

The measured optical power curve showed in Fig. 3 of the manuscript are in good agreement with this effective RI numerical simulation over time. Indeed, output curve are predominantly shaped by the resonance peak shift dynamics, which is itself dictated by the effective RI variation in time.

The mismatch between the simulated RI variation curve and the measured losses vs time can be justified by the lack of light-matter interaction phenomenon considered by the numerical model. Indeed, the simulation algorithm does not take into account the absorption, diffraction or lens effect of the different parts of the cell. Also, the slope of the resonance peak in the spectrum is not linear and thus will also mold the measured losses curve. Still, this RI variation numerical model gives a good understanding of how the deformation of the cell and the relative position of the nucleus affect the measured curve.

## Inertial focusing length and cells spread

The required length for complete inertial focusing in a two-stage scheme as reported by Zhou and Papautsky is:

$$L = \frac{3\pi\mu D_h^2}{4\rho U_f D_{cell}^3} \left( \frac{H}{C_L^-} + \frac{W}{C_L^+} \right) \quad \text{for } W > H$$

where  $\mu$  and  $\rho$  are the fluid viscosity and density respectively,  $D_h = 2WH/(W + H)$  is the hydraulic diameter,  $H$  and  $W$  are the channel height and width respectively,  $U_f$  is the average fluid velocity,  $D_{cell}$  is the cell diameter and  $C_L^-$  and  $C_L^+$  are the negative and positive lift coefficient respectively. Using the data provided by Zhou and Papautsky, the lift coefficients can be approximated.<sup>1</sup> This form is generally more restrictive (outputs longer lengths) than the one proposed by Di Carlo.<sup>2</sup> The table below reports the lift coefficients, the required focusing lengths and the resulting spreads in width  $W_{spread}$  for a cavity placed 1.2 mm away from the beginning of the straight channel. Importantly, the cross-section dimensions for cells to be focused are  $H - D_{cell}$  and  $W - D_{cell}$  in height and width respectively. Also, the calculated spread in width includes the cells diameters as shown in Fig. S2.

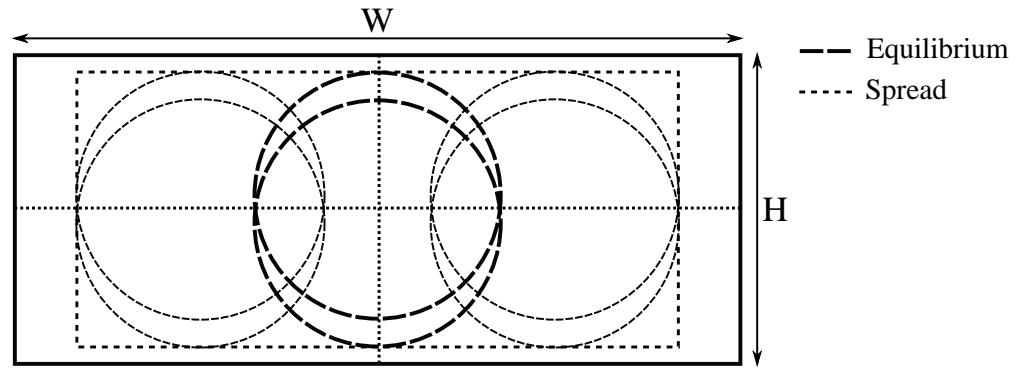

**Fig. S2** Inertial equilibrium positions in a rectangular channel and focusing area due to the spread in width.

**Table S1** Calculated lift coefficients, required focusing lengths and resulting spreads in width for a cavity placed 1.2 mm away from the beginning of the straight channel for cells of 12  $\mu\text{m}$  in a  $W = 40 \mu\text{m}$  by  $H = 15 \mu\text{m}$  channel at different flow rates.

| Flow rate $Q$ ( $\mu\text{l/min}$ ) | $C_L^-$ | $C_L^+$ | $L$ (mm) | $W_{spread}$ |
|-------------------------------------|---------|---------|----------|--------------|
| 5                                   | 0.47    | 0.048   | 2.7      | 27.9         |
| 10                                  | 0.21    | 0.026   | 2.6      | 27.2         |
| 15                                  | 0.14    | 0.018   | 2.5      | 26.8         |
| 20                                  | 0.1     | 0.014   | 2.5      | 26.5         |
| 30                                  | 0.06    | 0.009   | 2.4      | 26.1         |

**Table S2** Calculated lift coefficients, required focusing length and resulting spread in width for a cavity placed 1.2 mm away from the beginning of the straight channel for cells of 12  $\mu\text{m}$  in a  $W = 30 \mu\text{m}$  by  $H = 15 \mu\text{m}$  channel at 15  $\mu\text{l/min}$ .

| Flow rate $Q$ ( $\mu\text{l/min}$ ) | $C_L^-$ | $C_L^+$ | $L$ (mm) | $W_{spread}$ |
|-------------------------------------|---------|---------|----------|--------------|
| 15                                  | 0.11    | 0.015   | 1.2      | 12.5         |

## Curve parameters dependencies to relative nucleus position

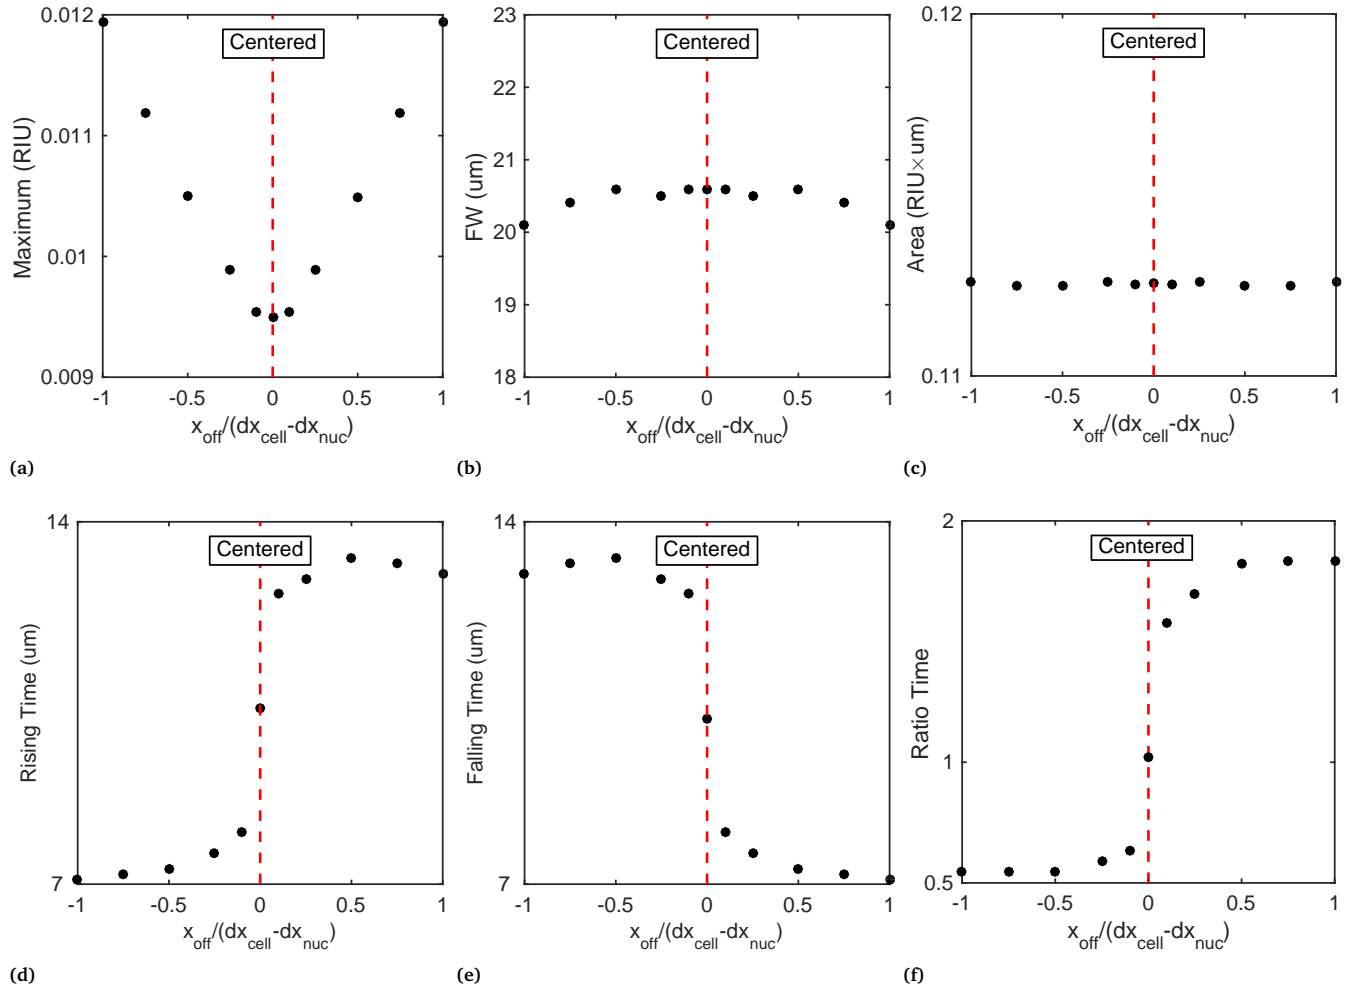

**Fig. S3** Computed parameter values from simulated curve when varying the relative nucleus position for (a) max, (b) full width (FW), (c) area, (d) rising time (RT), (e) falling time (FT) and (f) ratio time. Red dashed lines indicates a centered nucleus position. Each steps are 25% offset except for the two points closest to the centered position which are  $\pm 10\%$ .

## Curve parameters dependencies to deformed cell length

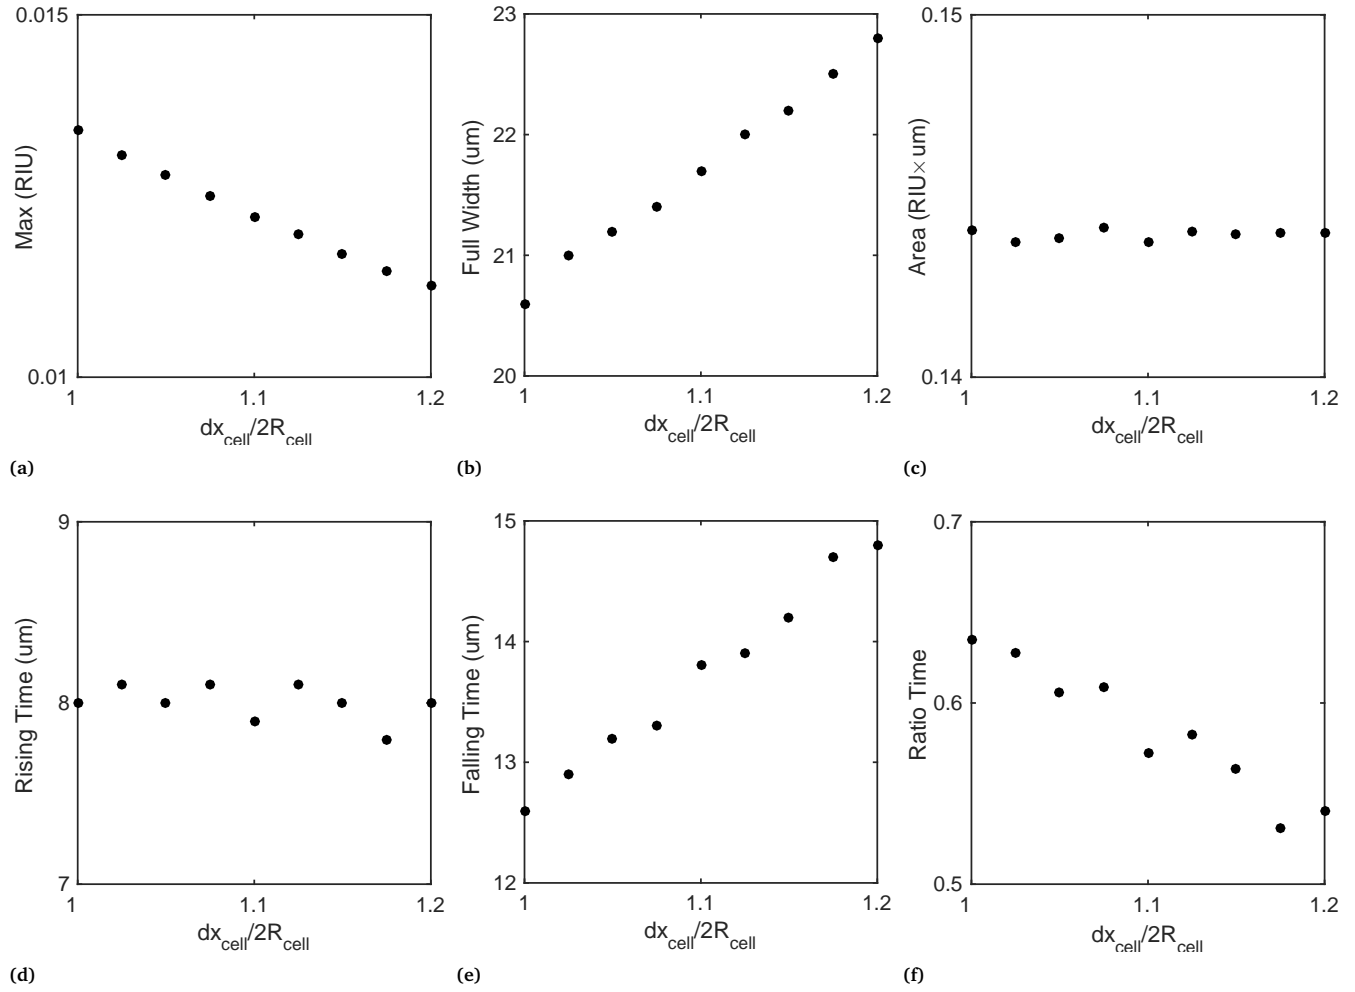

**Fig. S4** Computed parameter values from simulated curve when varying the deformed cell length in the x-axis for (a) max, (b) full width (FW), (c) area, (d) rising time (RT), (e) falling time (FT) and (f) ratio time. Deformed cell length is  $dx_{cell}/2R_{cell}$  where  $dx_{cell}$  is the diameter of the cell ellipsoid in the x-axis. A fixed 10% contraction deformation was imposed on the cell membrane ellipsoid in the y-axis. The nucleus radius was matched to the one of the cell in the y-axis by a 0.9% contraction deformation. For each step of 2.5% deformation, both the cell and the nucleus ellipsoids were deformed in the x-axis. The nucleus relative position was kept at  $x_{off}/(dx_{cell} - dx_{nuc}) = -0.5$ . Other nucleus relative position yielded similar results.

## Confocal microscopy

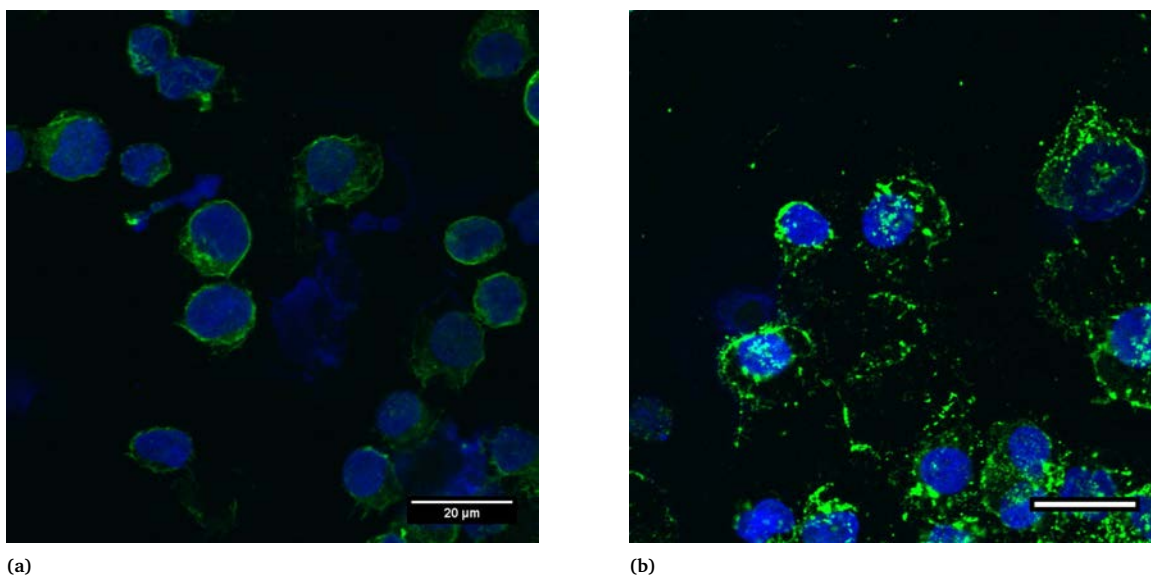

**Fig. S5** Confocal fluorescence microscopy images of cytopun immunostained control and cytochalasin B treated HL-60 cells. F-actin is stained with Alexa Fluor 488 phalloidin (green) and nuclei is stained with DAPI (blue). Top view of the fluorescence composite for (a) HL-60 cells control and (b) cytochalasin B treated HL-60 cells. Treated cells present clumps of phalloidine fluorescence associated to grouped broken-down actin filaments, responsible for the larger whole-cell deformability. Scale bars are 20  $\mu\text{m}$ .

# Flow cytometry measurement of control and cytochalasin B treated HL-60 cells

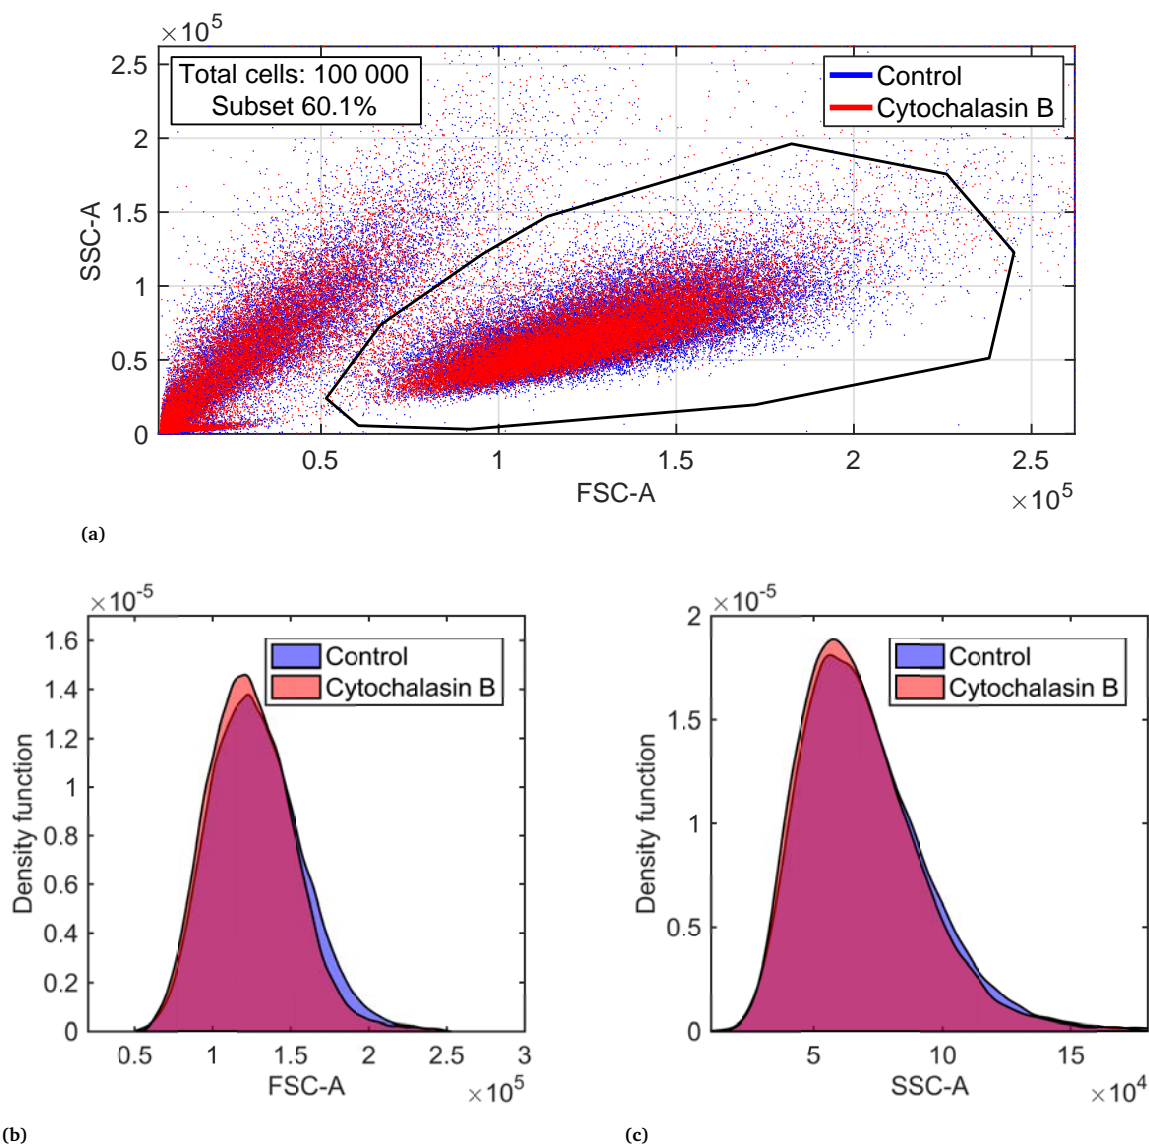

**Fig. S6** Flow cytometry measurements of control and cytochalasin B treated HL-60 cells. (a) Flow cytometry FSC-A and SSC-A dot plot superimposition (2D OLR=1). (b) FSC-A histogram (1D OLR=1) and (c) SSC-A histogram (1D OLR=1) of subsets. One representative of at least two experiments.

## Measured curve parameters dependencies to flow rate

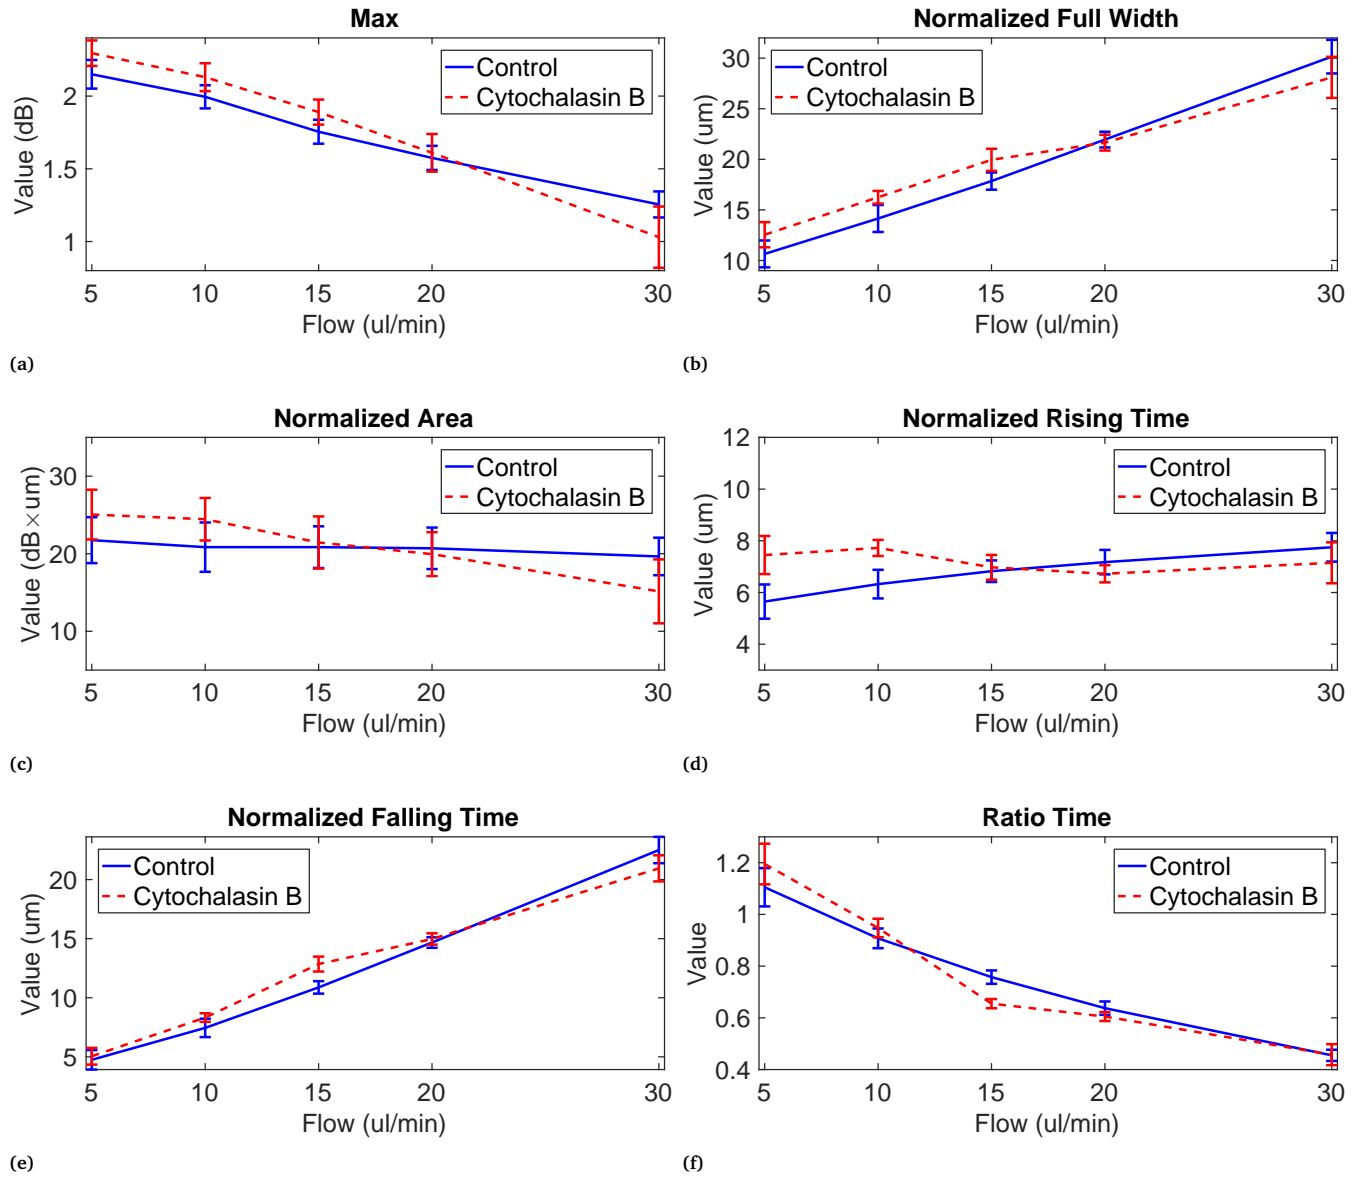

**Fig. S7** Measured curve parameters dependencies to flow rate for (a) max, (b) full width (FW) normalized by velocity, (c) area normalized by velocity, (d) rising time (RT) normalized by velocity, (e) falling time (FT) normalized by velocity and (f) ratio time. Each error bar is  $\pm$  one standard deviation derived from the normal distribution fitted over the corresponding parameter at a particular flow rate for a specific cell type. Parameters with time dependence, FW, area, RT and FT were multiplied by the particle velocity to represent values in terms of length rather than time. The total mode field diameter (MFD) of the fiber, or a fraction for RT and FT, was subsequently subtracted. Total number of cells and subset at each flow rate for control and Cytochalasin B treated HL-60 cells are reported in Tab. S3.

Larger flow rates implies larger forces acting on the cell thus more deformation is anticipated along the flowing direction. All parameters follow the predicted tendencies for both control and cytochalasin treated HL-60 cells (Fig. S4). Expectedly, FW values increase with increasing flow rates whereas max values decrease and normalized area values stay constant as shown in Fig.S7b, S7a and S7c respectively. Since the total effective RI volume (area) stays constant the volume ratio of the cell to the cavity is



smaller and thus yields smaller measured maximal RI variation (max). Variation of ratio time in function of flow rates reported in Fig.S7f shows decreasing values with increasing flow, rising time, Fig.S7d, shows relatively constant values whereas falling time, Fig.S7e, shows increasing values.

Interestingly, at a flow of 5  $\mu\text{l}/\text{min}$  (particle velocity  $U_p = 0.06 \text{ m/s}$ ), both cell populations report signals yielding a ratio time value  $> 1$ . This indicates that the nucleus is positioned at the leading side of the cell rather than at the trailing side. At a flow of 10  $\mu\text{l}/\text{min}$  ( $U_p = 0.13 \text{ m/s}$ ), the ratio time is very close to or slightly larger than 1, indicating near-symmetric RI distribution and a centered nucleus. For flows  $> 15 \mu\text{l}/\text{min}$  ( $U_p > 0.19 \text{ m/s}$ ), ratio time values are  $< 1$  indicating a nucleus positioned at the trailing side of the cell. These results suggest a transition between 5 and 15  $\mu\text{l}/\text{min}$  for the nucleus to be placed at the leading or trailing side of the cell.

These flows coincide to particle Reynolds number  $Re_p = Re(2R_{cell}/D_h)^2$  of 0.9 and 2.75 respectively, where  $Re$  is the channel Reynolds number and  $D_h$  is the hydraulic diameter of the channel. At  $Re_p = 1$ , namely the transition point between stokes and turbulent drag, the flow rate is 5.5  $\mu\text{l}/\text{min}$  ( $U_p = 0.07 \text{ m/s}$ ). The transition of the particle Reynolds number from smaller to larger than 1 might be related to the ratio time transition, thus the relative position of the nucleus from trailing to leading. Indeed, a turbulent drag near the cell might promote the deformation of the membrane towards the leading side. Further investigation is required to confirm this theory.

**Table S3** Total number of cells and subset at each flow rate for control and Cytochalasin B treated HL-60 cells.

|                               | Control |        | Cytochalasin B |        |
|-------------------------------|---------|--------|----------------|--------|
|                               | Total   | Subset | Total          | Subset |
| Q=5 $\mu\text{l}/\text{min}$  | 48 057  | 80.0%  | 45 835         | 75.4%  |
| Q=10 $\mu\text{l}/\text{min}$ | 47 879  | 85.8%  | 36 518         | 54.9%  |
| Q=15 $\mu\text{l}/\text{min}$ | 47 536  | 65.2%  | 50 759         | 62.8%  |
| Q=20 $\mu\text{l}/\text{min}$ | 46 780  | 85.7%  | 51 081         | 46.6%  |
| Q=30 $\mu\text{l}/\text{min}$ | 10 188  | 68.0%  | 49 864         | 85.7%  |

## Derivation of particle velocities

The average particle velocity  $U_p$  is set to a fraction of the average fluid velocity in the microchannel  $U_p = \gamma \times U_f$ . The factor  $\gamma$  is experimentally derived as follows:

$$\gamma = \frac{U_p}{U_f} \quad \text{where} \quad U_f = \frac{Q}{W \times H} \quad \text{and} \quad U_p = \frac{D_{cell} + MFD}{\overline{FW}}$$

$$\gamma = \frac{D_{cell} + MFD}{\overline{FW} \times U_f} = \frac{(D_{cell} + MFD)(W \times H)}{\overline{FW} \times Q}$$

where  $Q$  is the flow rate,  $W$  and  $H$  are the channel width and height respectively,  $D_{cell} = 12 \mu m$  is the cell diameter,  $MFD = 10.4 \mu m$  is the mode field diameter of the SMF-28 optical fiber and  $\overline{FW}$  is the average measured full width (FW) at the specific flow  $Q$ . This equation is valid for undeformed cells, at flows of 5 and 10  $\mu l/min$  where the Ratio Time value is  $\geq 1$ . At  $Q=5 \mu l/min$  in a  $W = 40 \mu m$  by  $H = 15 \mu m$  channel,  $\overline{FW} = 3.37 \times 10^{-4}$  and yields a factor  $\gamma = 0.48$  whereas at  $Q=10 \mu l/min$ ,  $\overline{FW} = 1.95 \times 10^{-4}$  and yields a factor  $\gamma = 0.41$ . Thus, the  $\gamma$  factor was set to an average of 0.45.

The theoretical derivation of the factor  $\gamma$  yields an equivalent value. Comparing the two forms of the particle Reynolds number  $Re_p$ :

$$Re_p = Re \left( \frac{D_{cell}}{D_h} \right)^2 \Leftrightarrow Re_p = \frac{\rho (U_f - U_p) D_{cell}}{\mu}$$

$$Re_p = \frac{\rho U_f D_h}{\mu} \left( \frac{D_{cell}}{D_h} \right)^2 \Leftrightarrow Re_p = \frac{\rho U_f (1 - \gamma) D_{cell}}{\mu}$$

$$\gamma = 1 - \frac{D_{cell}}{D_h}$$

where  $D_h = 2WH/(W + H)$  is the hydraulic diameter and  $\rho$  and  $\mu$  are the fluid density and viscosity respectively. For the considered channel dimensions and cell diameter,  $\gamma = 0.45$ . Average fluid velocities, particle velocities,  $Re$  and  $Re_p$  calculated in a  $W = 40 \mu m$  by  $H = 15 \mu m$  channel at the different imposed flow rates using this factor are reported in Tab. S4. The same quantities in a  $W = 30 \mu m$  by  $H = 15 \mu m$  channel at a flow rate of 15  $\mu l/min$  using  $\gamma = 0.40$  are reported in Tab. S5.

**Table S4** Calculated average fluid and particle velocities,  $Re$  and  $Re_p$  at the different imposed flow rates for  $W = 40 \mu m$ ,  $H = 15 \mu m$  and  $D_{cell} = 12 \mu m$  using  $\gamma = 0.45$ .

| Flow rate $Q$ ( $\mu l/min$ )       | 5      | 10    | 15     | 20   | 30    |
|-------------------------------------|--------|-------|--------|------|-------|
| Fluid velocity $U_f$ (m/s)          | 0.14   | 0.28  | 0.42   | 0.56 | 0.83  |
| Reynolds number (Re)                | 3      | 6     | 9      | 12   | 18    |
| Particle velocity $U_p$ (m/s)       | 0.0625 | 0.125 | 0.1875 | 0.25 | 0.375 |
| Particle Reynolds number ( $Re_p$ ) | 0.9    | 1.8   | 2.75   | 3.7  | 5.5   |

**Table S5** Calculated average fluid and particle velocities,  $Re$  and  $Re_p$  at a flow rate of 15  $\mu l/min$  for  $W = 30 \mu m$ ,  $H = 15 \mu m$  and  $D_{cell} = 12 \mu m$  using  $\gamma = 0.40$ .

| Flow rate $Q$ ( $\mu l/min$ )       | 15   |
|-------------------------------------|------|
| Fluid velocity $U_f$ (m/s)          | 0.56 |
| Reynolds number (Re)                | 11   |
| Particle velocity $U_p$ (m/s)       | 0.22 |
| Particle Reynolds number ( $Re_p$ ) | 4.0  |

## Coefficients of variation (CV) of flow cytometry and RIC measurements

**Table S6** Calculated coefficients of variation of FSC-A and SSC-A measurements for control and Cytochalasin B treated HL-60 cells.

|                | FSC-A | SSC-A |
|----------------|-------|-------|
| Control        | 22.6% | 34.7% |
| Cytochalasin B | 21.8% | 33.8% |

**Table S7** Calculated coefficients of variation of Max, FW, Area, RT, FT and Ratio Time measurements for control and Cytochalasin B treated HL-60 cells at all flow rates.

|                | Flow rate Q ( $\mu$ l/min) | Max   | FW   | Area  | RT    | FT    | Ratio Time |
|----------------|----------------------------|-------|------|-------|-------|-------|------------|
| Control        | 5                          | 10.6% | 7.5% | 17.5% | 9.8%  | 13.6% | 14.8%      |
|                | 10                         | 7.9%  | 6.8% | 16.1% | 7.6%  | 8.3%  | 8.0%       |
|                | 15                         | 7.5%  | 5.4% | 15.6% | 5.6%  | 6.8%  | 6.4%       |
|                | 20                         | 7.8%  | 3.8% | 14.6% | 5.8%  | 3.8%  | 5.5%       |
|                | 30                         | 9.6%  | 4.2% | 14.0% | 7.1%  | 5.4%  | 9.7%       |
| Cytochalasin B | 5                          | 4.9%  | 6.6% | 12.6% | 7.7%  | 9.5%  | 9.6%       |
|                | 10                         | 8.2%  | 3.6% | 13.9% | 4.0%  | 5.4%  | 6.1%       |
|                | 15                         | 14.0% | 5.4% | 22.3% | 6.0%  | 5.5%  | 3.6%       |
|                | 20                         | 18.9% | 4.0% | 22.7% | 4.3%  | 4.6%  | 4.2%       |
|                | 30                         | 22.1% | 6.2% | 29.1% | 10.3% | 7.0%  | 11.5%      |

**Table S8** Calculated coefficients of variation of FSC-A and SSC-A measurements for neutrophils, basophils and baseline conditions.

|             | FSC-A | SSC-A |
|-------------|-------|-------|
| Neutrophils | 13.2% | 23.2% |
| Basophils   | 15.6% | 29.9% |
| Baseline    | 15.7% | 30.4% |

**Table S9** Calculated coefficients of variation of Max, FW, Area, RT, FT and Ratio Time measurements for neutrophils, basophils and baseline conditions at a flow rate of 15  $\mu$ l/min.

|             | Max   | FW   | Area  | RT   | FT   | Ratio Time |
|-------------|-------|------|-------|------|------|------------|
| Neutrophils | 9.2%  | 5.7% | 12.8% | 7.6% | 5.0% | 5.1%       |
| Basophils   | 9.4%  | 4.0% | 13.3% | 4.5% | 4.1% | 2.5%       |
| Baseline    | 11.8% | 8.4% | 16.8% | 8.6% | 8.4% | 3.2%       |

## OLR of myeloid cells populations

**Table S10** Calculated 1D OLR values of all combinations of myeloid cells for discrimination.

|                   | Neutrophils vs Basophils | Neutrophils vs Baseline | Basophils vs Baseline |
|-------------------|--------------------------|-------------------------|-----------------------|
| Max               | 1                        | 1                       | 1                     |
| Full width (FW)   | 1                        | 0.91                    | 1                     |
| Area              | 1                        | 0.90                    | 1                     |
| Rising time (RT)  | 0.98                     | 0.83                    | 1                     |
| Falling time (FT) | 1                        | 1                       | 0.998                 |
| Ratio time        | 1                        | 1                       | 1                     |

1D OLR are not smaller than 1 in all cases. However, using the right combination of parameters, cell populations can be easily discriminated. Indeed, OLR computed in 3D using the FW, RT and FT are all below 1 (3D OLR neutrophils-basophils=0.41, neutrophils-baseline=0.82 and basophils-baseline=0.66).

**References**

- 1 J. Zhou and I. Papautsky, *Lab on a chip*, 2013, **13**, 1121–32.
- 2 D. Di Carlo, *Lab on a Chip*, 2009, **9**, 3038–3046.
